# Supplementary material for: Application of Thiolated Silica Nanoparticles in Food Industries
Source: MDPI journal article supplement (doi:10.3390/proceedings2024105052), 2024-05-28
Supplement: s1 [file proceedings-3147193-supplementary.pdf › proceedings-3147193-supplementary.pdf]

## Application of of thiolated silica nanoparticles in food industries

Shakeel Ahmed Ansari<sup>1</sup>, Rukhsana Satar<sup>2</sup>

Department of Biochemistry, Medicine Program, <sup>1</sup>Batterjee Medical College, Jeddah, Saudi Arabia

<sup>2</sup>Ibn Sina National Medical College, Jeddah, Saudi Arabia

### INTRODUCTION & AIM

- ❖ Lactose intolerance is an inability to completely digest lactose present in dairy items Hence, such discomfort level leads to diarrhea, nausea, vomiting, gas and bloating.
- ❖ Over the counter tablets or drops containing the lactase ( $\beta$  galactosidase), help in digesting such dairy products.
- ❖ In another approach, immobilized biocatalysts are utilized for obtaining lactose free dairy products due to their greater stability and reusability Such immobilized preparations also retained higher enzyme activity in extreme conditions.

### METHOD

- ❖ Thiol functionalized silica nanoparticles were prepared via sol gel process Fifty ml NaOH (14 mM) was heated by vigorous stirring at 70°C followed by the addition of tetraethyl orthosilicate (50  $\mu$ l) and mercaptopropyl trimethoxysilane (100  $\mu$ l) after 5 minutes  $\beta$  galactosidase was immobilized on thiolated Si NPs. The reaction was allowed to continue for 3 hours.
- ❖ Stability of soluble and immobilized  $\beta$  galactosidase was analyzed at various pH and temperature ranges.
- ❖ Batch conversion of lactose:  
Lactose solution was stirred continuously with soluble and immobilized enzyme independently at 50 °C and 60 °C in water bath for 10 h The aliquots were drawn after every hour and assayed for glucose estimation by glucose oxidase peroxidase assay kit.

### RESULTS & DISCUSSION

- ❖ Cloudy nanoparticle suspension were collected by centrifugation.
- ❖ Immobilized enzyme exhibited remarkable stability at varying pH [Fig 1 and temperature ranges [Fig 2 as compared to the native enzyme.
- ❖ Improved conversion of lactose was monitored by  $\beta$  galactosidase conjugated to modified SiNPs at higher temperature ranges [Table 1].

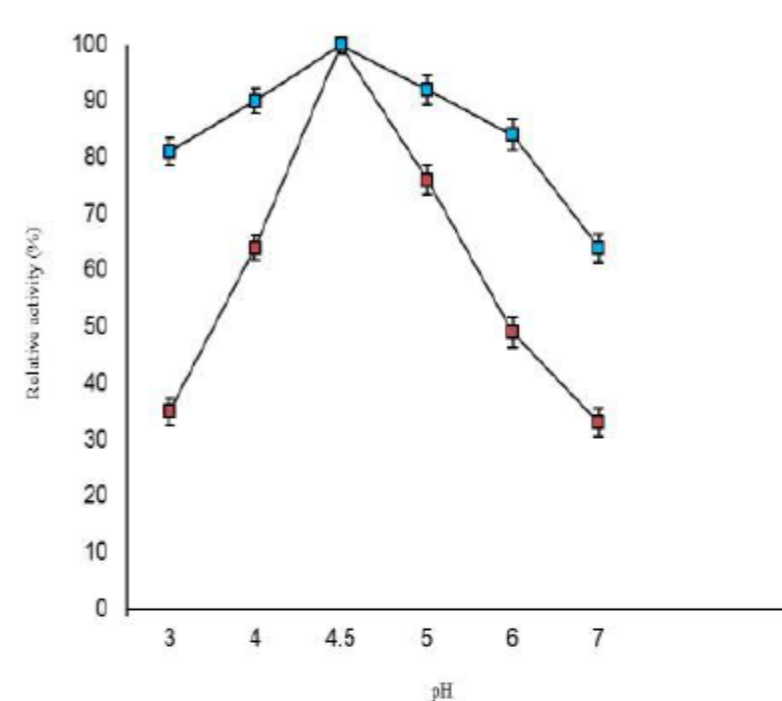

Figure 1. pH-activity profile

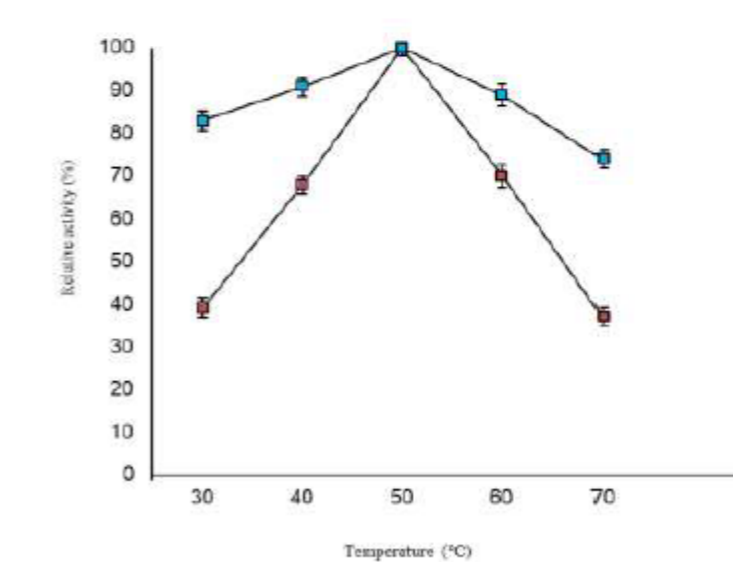

Figure 2. Temperature-activity profile

Table 1. Lactose hydrolysis

| Time (h) | Lactose hydrolysis (%) |                    |                |                    |
|----------|------------------------|--------------------|----------------|--------------------|
|          | 60 °C                  |                    | 50 °C          |                    |
|          | Soluble enzyme         | Immobilized enzyme | Soluble enzyme | Immobilized enzyme |
| Control  | 0                      | 0                  | 0              | 0                  |
| 1        | 11±2.3                 | 8±2.6              | 16±4.3         | 12±2.6             |
| 2        | 18±3.1                 | 17±2.4             | 25±2.4         | 32±4.6             |
| 3        | 23±4.6                 | 33±3.1             | 33±3.4         | 44±2.8             |
| 4        | 39±1.9                 | 48±4.1             | 42±3.7         | 57±2.6             |
| 5        | 44±2.1                 | 51±3.3             | 49±2.9         | 65±1.6             |
| 6        | 51±2.3                 | 62±1.2             | 57±1.3         | 70±2.6             |
| 7        | 54±3.2                 | 66±2.8             | 63±1.5         | 74±4.4             |
| 8        | 58±1.7                 | 70±1.4             | 66±1.9         | 74±2.8             |
| 9        | 58±3.5                 | 70±3.7             | 70±4.3         | 81±1.6             |
| 10       | 58±2.8                 | 70±2.8             | 70±3.0         | 81±3.5             |

### CONCLUSION

Greater conversion of lactose was obtained by  $\beta$  galactosidase conjugated to thiolated SiNPs at high temperature Hence, it could prove useful in suggested biotechnological application.

### FUTURE WORK / REFERENCES

1. Ansari SA, Damanhory AA. *Heliyon* 2023,9, e13089
2. Alzahrani F, Akanbi TO, Scarlett CJ, Aryee ANA. *Processes* 2024, 12, 634
3. de Freitas LA, de Sousa M, Ribeiro LB, de Franca IWL, Goncalves LRB. *Catalysts* 2023,13, 306
